# Supplementary material for: Relationship between Abnormal Placenta and Obstetric Outcomes: A Meta-Analysis
Source: MDPI journal article supplement (doi:10.3390/biomedicines11061522), 2023-05-25
Supplement: s1 [file s1]

## Supplemental File S1. The search strategy.

### PubMed

#1 "abnormal placenta" [TIAB] OR "placenta abnormality" [TIAB] OR "placental variants" [TIAB]  
#2 multilobed placenta [TIAB] OR bilobate placenta [TIAB] OR bilobed placenta [TIAB] OR placenta bilobate [TIAB] OR bipartite placenta [TIAB] OR placenta duplex [TIAB] OR succenturiate placenta [TIAB] OR accessory lobe [TIAB] OR succenturiate lobe [TIAB] OR circumvallate placenta [TIAB] OR circummarginate placenta [TIAB] OR fenestrated placenta [TIAB] OR ring-shaped placenta [TIAB] OR zonary placenta [TIAB] OR placenta membranacea  
#3 #1 OR #2

### Cochrane Library

#1 "abnormal placenta": ab,ti,kw OR "placenta abnormality": ab,ti,kw OR "placental variants": ab,ti,kw  
#2 multilobed placenta: ab,ti,kw OR placenta bilobate: ab,ti,kw OR bipartite placenta: ab,ti,kw OR placenta duplex: ab,ti,kw OR succenturiate lobe: ab,ti,kw OR fenestrated placenta: ab,ti,kw OR ring-shaped placenta: ab,ti,kw OR zonary placenta: ab,ti,kw OR placenta membranacea  
#3 bilobate placenta: ab,ti,kw OR bilobed placenta: ab,ti,kw OR succenturiate placenta: ab,ti,kw OR accessory lobe: ab,ti,kw OR succenturiate lobe: ab,ti,kw OR circumvallate placenta: ab,ti,kw OR circummarginate placenta: ab,ti,kw OR fenestrated placenta: ab,ti,kw  
#4 #1 OR #2 OR #3

### Scopus

#1 TITLE-ABS-KEY ("abnormal placenta" OR "placenta abnormality" OR "placental variants")  
#2 TITLE-ABS-KEY ("multilobed placenta" OR "bilobate placenta" OR "bilobed placenta" OR "succenturiate placenta" OR "accessory lobe" OR "succenturiate lobe" OR "circumvallate placenta" OR "circummarginate placenta" OR fenestrated placenta)  
#3 TITLE-ABS-KEY ("placenta bilobate" OR "bipartite placenta" OR "placenta duplex" OR "succenturiate lobe" OR "fenestrated placenta" OR "ring-shaped placenta" OR "zonary placenta" OR "placenta membranacea")

(( ( TITLE-ABS-KEY ( "abnormal placenta" OR "placenta abnormality" OR "placental variants" ) ) OR ( TITLE-ABS-KEY ( "abnormal placenta" OR "placenta abnormality" OR "bilobate placenta" OR "bilobed placenta" OR "succenturiate placenta" OR "accessory lobe" OR "succenturiate lobe" OR "circumvallate placenta" OR "circummarginate placenta" OR fenestrated AND placenta ) ) OR ( TITLE-ABS-KEY ( "placenta bilobate" OR "bipartite placenta" OR "placenta duplex" OR "succenturiate lobe" OR "fenestrated placenta" OR "ring-shaped placenta" OR "zonary placenta" OR "placenta membranacea" ) ) ) )

**Table S1. Metadata of eligible studies.**

| Author               | Year | Location | Type     | Placenta      | Total | N   | ART | CD | ID | PTB | PROM | HDP | FGR | IUFD | PA | PPH | PP | PAS | RPOC |
|----------------------|------|----------|----------|---------------|-------|-----|-----|----|----|-----|------|-----|-----|------|----|-----|----|-----|------|
| Smith M [1]          | 2022 | NZL      | Case     | Mul (Furcate) | --    | 1   | --  | -- | -- | --  | --   | --  | ○   | --   | -- | --  | -- | --  | --   |
| Swanson K [2]        | 2021 | USA      | Original | Cir, Suc, Mul | 311   | 11  | --  | -- | -- | --  | --   | --  | --  | --   | -- | --  | -- | --  | --   |
| Kutuk MS [3]         | 2021 | TUR      | Case     | Mul           | --    | 1   | --  | -- | -- | --  | --   | --  | --  | --   | -- | --  | -- | --  | --   |
| Celik OY [4]         | 2021 | TUR      | Original | Cir           | 154   | 77  | --  | ○  | -- | ○   | --   | ○   | --  | ○    | ○  | --  | -- | --  | --   |
| Detweiler M [5]      | 2021 | USA      | Case     | Suc           | --    | 1   | --  | -- | -- | --  | --   | --  | --  | --   | -- | --  | ○  | ○   | --   |
| Volodarsky A [6]     | 2021 | CAN      | Original | Cir, Suc, Mul | 677   | 25  | ○   | -- | -- | --  | --   | --  | --  | --   | -- | --  | -- | --  | --   |
| Hasegawa J [7]       | 2021 | JPN      | Case     | Cir           | --    | 1   | --  | -- | -- | --  | --   | --  | ○   | --   | -- | --  | -- | --  | --   |
| Sacha CR [8]         | 2020 | USA      | Original | Mul, Suc      | 1140  | 132 | ○   | -- | -- | --  | --   | --  | --  | --   | -- | --  | -- | --  | --   |
| Volodarsky A [9]     | 2020 | CAN      | Original | Suc, Mul, Cir | 1057  | 41  | --  | -- | -- | --  | --   | --  | --  | --   | -- | --  | -- | --  | --   |
| Abgral M [10]        | 2020 | FRN      | Case     | Mul           | --    | 2   | --  | -- | -- | --  | --   | --  | --  | --   | -- | --  | -- | --  | --   |
| Walter A [11]        | 2020 | GER      | Series   | Mul           | --    | 5   | --  | -- | -- | --  | --   | --  | ○   | --   | -- | --  | -- | --  | --   |
| Tang L [12]          | 2019 | CHN      | Original | Mem           | 79862 | 3   | --  | -- | -- | --  | ○    | --  | ○   | ○    | -- | --  | ○  | --  | --   |
| Hamadeh S [13]       | 2018 | KSA      | Case     | Suc           | --    | 1   | --  | ○  | -- | --  | --   | --  | --  | --   | ○  | --  | -- | --  | --   |
| Sharma N [14]        | 2017 | IND      | Case     | Cir           | --    | 1   | --  | -- | -- | --  | --   | --  | --  | ○    | -- | --  | -- | --  | --   |
| Stelzl PW [15]       | 2017 | USA      | Case     | Suc           | --    | 1   | --  | -- | -- | --  | --   | --  | --  | --   | -- | --  | -- | --  | --   |
| Ma JS [16]           | 2016 | CHN      | Original | Suc           | 28256 | 294 | ○   | ○  | -- | ○   | --   | ○   | ○   | ○    | -- | ○   | ○  | --  | ○    |
| Biswas PR [17]       | 2016 | BGD      | Case     | Mul           | --    | 1   | --  | -- | -- | --  | --   | --  | ○   | --   | -- | --  | ○  | --  | --   |
| Yang PY [18]         | 2016 | JPN      | Case     | Mul           | --    | 1   | --  | -- | -- | --  | --   | --  | --  | --   | -- | --  | -- | --  | --   |
| Suzuki S [19]        | 2015 | JPN      | Original | Cir, Suc, Mul | 16965 | 355 | --  | -- | -- | --  | --   | --  | --  | --   | -- | --  | -- | --  | --   |
| Patra S [20]         | 2015 | IND      | Case     | Suc           | --    | 1   | --  | -- | -- | --  | --   | --  | --  | --   | -- | ○   | ○  | --  | --   |
| Taniguchi H [21]     | 2014 | JPN      | Original | Cir           | 9149  | 92  | ○   | ○  | ○  | ○   | ○    | --  | --  | --   | ○  | --  | -- | --  | --   |
| Cavaliere AF [22]    | 2014 | ITA      | Case     | Suc           | --    | 1   | --  | ○  | -- | --  | --   | --  | --  | --   | -- | --  | -- | --  | --   |
| Ravangard SF [23]    | 2013 | USA      | Case     | Mem           | --    | 1   | --  | -- | -- | ○   | --   | --  | --  | --   | ○  | --  | -- | --  | --   |
| Morales J [24]       | 2012 | SPN      | Case     | Suc           | --    | 1   | --  | -- | -- | --  | --   | --  | --  | --   | -- | --  | ○  | --  | --   |
| Suzuki S [25]        | 2010 | JPN      | Original | Cir, Suc      | 11311 | 298 | --  | -- | -- | --  | --   | --  | --  | --   | ○  | --  | ○  | --  | ○    |
| Suzuki S [26]        | 2008 | JPN      | Original | Cir           | 722   | 11  | --  | -- | -- | --  | --   | --  | ○   | --   | ○  | --  | -- | --  | --   |
| Suzuki S [27]        | 2008 | JPN      | Original | Cir           | 7930  | 139 | ○   | ○  | ○  | ○   | --   | ○   | ○   | ○    | ○  | ○   | -- | --  | --   |
| Suzuki S [28]        | 2008 | JPN      | Original | Suc           | 7713  | 47  | ○   | ○  | ○  | ○   | --   | --  | ○   | ○    | ○  | ○   | ○  | --  | ○    |
| Seleye-Fubara D [29] | 2005 | NGA      | Case     | Suc           | --    | 1   | --  | -- | -- | --  | --   | --  | --  | ○    | ○  | --  | -- | --  | --   |
| Ventolini G [30]     | 2004 | USA      | Original | Cir           | 88    | 4   | --  | -- | -- | --  | --   | --  | --  | --   | -- | --  | -- | --  | --   |
| Brucks UA [31]       | 2002 | USA      | Case     | Mul           | --    | 1   | --  | -- | -- | --  | --   | --  | --  | --   | -- | --  | -- | --  | --   |
| Shukunami K [32]     | 2001 | JPN      | Case     | Suc           | --    | 2   | --  | -- | -- | --  | --   | --  | --  | --   | ○  | --  | ○  | --  | --   |
| Walkup DWM [33]      | 2001 | USA      | Case     | Mul           | --    | 1   | --  | -- | -- | --  | --   | --  | --  | --   | -- | --  | -- | --  | --   |
| Chihara H [34]       | 2000 | JPN      | Case     | Suc           | --    | 1   | --  | -- | -- | --  | --   | --  | --  | --   | -- | --  | -- | --  | --   |
| Harris RD [35]       | 1997 | USA      | Original | Cir           | --    | 13  | --  | -- | -- | ○   | --   | ○   | ○   | --   | ○  | --  | -- | --  | --   |
| Steemers NY [36]     | 1995 | BEL      | Case     | Zonary        | --    | 1   | --  | ○  | -- | --  | --   | --  | --  | --   | -- | --  | -- | --  | --   |
| McCarthy J [37]      | 1995 | USA      | Original | Cir           | --    | 12  | --  | ○  | -- | --  | --   | --  | --  | --   | ○  | ○   | -- | --  | --   |
| Sistrom CL [38]      | 1993 | USA      | Original | Cir           | 1784  | 3   | --  | -- | -- | ○   | --   | --  | --  | --   | -- | --  | -- | --  | --   |
| Dinh TV [39]         | 1992 | USA      | Case     | Mem           | --    | 1   | --  | -- | -- | --  | --   | --  | --  | --   | -- | --  | -- | ○   | --   |
| Bey M [40]           | 1991 | USA      | Case     | Cir           | --    | 1   | --  | -- | -- | --  | --   | --  | --  | --   | -- | --  | -- | --  | --   |
| Greenberg JA [41]    | 1991 | USA      | Case     | Mem           | --    | 1   | --  | -- | -- | ○   | --   | --  | --  | --   | ○  | --  | -- | ○   | --   |

|                     |      |     |          |     |     |    |    |    |    |    |    |    |    |    |    |    |    |    |
|---------------------|------|-----|----------|-----|-----|----|----|----|----|----|----|----|----|----|----|----|----|----|
| Wilkins BS [42]     | 1991 | GER | Series   | Mem | --  | 7  | -- | -- | -- | ○  | -- | -- | -- | -- | -- | -- | -- | -- |
| Hata K [43]         | 1988 | JPN | Series   | Suc | --  | 5  | -- | -- | -- | -- | -- | -- | -- | ○  | -- | -- | -- | -- |
| Jeanty P [44]       | 1983 | BEL | Series   | Suc | --  | 4  | -- | -- | -- | -- | -- | -- | -- | -- | -- | -- | -- | -- |
| Rolschau J [45]     | 1978 | DEN | Original | Cir | 447 | 19 | -- | -- | -- | ○  | -- | -- | ○  | -- | -- | -- | -- | -- |
| Nelson LH [46]      | 1977 | USA | Case     | Suc | --  | 1  | -- | -- | -- | ○  | -- | -- | -- | -- | -- | -- | -- | -- |
| Wladimiroff JW [47] | 1976 | NLD | Case     | Mem | --  | 1  | -- | -- | -- | ○  | -- | -- | -- | ○  | -- | -- | -- | -- |
| Mathews J [48]      | 1974 | AUS | Case     | Mem | --  | 1  | -- | -- | -- | ○  | -- | -- | -- | -- | -- | -- | -- | -- |

Information regarding the outcome of interest was extracted and is summarized in Table. Abbreviations: ○, data is available; N, number of women with circumvallate placenta; --, not applicable; NZL, New Zealand; USA, United States of America; TUR, Turkey; CAN, Canada; JPN, Japan; FRN, France; GER, Germany; CHN, China; KSA, Kingdom of Saudi Arabia; IND, India; BGD, Bangladesh; ITA, Italy; SPN, Spain; NGA, Nigeria; BEL, Belgium; DEN, Denmark; NLD, Netherland; AUS, Australia; ART, Assisted reproductive technology; CD, cesarean delivery; ID, instrumental delivery; PTB, preterm birth; PROM, preterm rupture of membrane; HDP, hypertensive disorder of pregnancy; FGR, fetal growth restriction; IUFD, intrauterine fetal death; PA, placenta abruption; PP, placenta previa; PPH, postpartum; PAS, placenta accreta spectrum and RPOC, retained products of conception.

**Table S2. Risk bias assessment of comparator studies.**

| Authors          | Confounding | Selection | Classification of intervention | Deviations from interventions | Missing data | Measurement of outcomes | Reported results | Overall bias |
|------------------|-------------|-----------|--------------------------------|-------------------------------|--------------|-------------------------|------------------|--------------|
| Celik OY [4]     | ●           | ●         | ●                              | ●                             | ●            | ●                       | ●                | ●            |
| Ma JS [16]       | ●           | ●         | ●                              | ●                             | ●            | ●                       | ●                | ●            |
| Taniguchi H [21] | ●           | ●         | ●                              | ●                             | ●            | ●                       | ●                | ●            |
| Suzuki S [25]    | ●           | ●         | ●                              | ●                             | ●            | ●                       | ●                | ●            |
| Suzuki S [26]    | ●           | ●         | ●                              | ●                             | ●            | ●                       | ●                | ●            |
| Suzuki S [27]    | ●           | ●         | ●                              | ●                             | ●            | ●                       | ●                | ●            |
| Rolschau J [45]  | ●           | ●         | ●                              | ●                             | ●            | ●                       | ●                | ●            |

Risk of bias assessment was performed using the Risk Of Bias In Non-randomized Studies–of Interventions tool (ROBINS-I) [49-51].

- Low risk of bias (the study is comparable to a well-performed randomized trial with regard to this domain)
- Moderate risk of bias (the study is sound for a non-randomized study with regard to this domain but cannot be considered comparable to a well-performed randomized trial)
- Serious risk of bias (the study has some important problems in this domain)
- Critical risk of bias (the study is too problematic in this domain to provide any useful evidence on the effects of intervention).
- No information on how to base a judgment on the risk of bias for this domain.

**Table S3. Study characteristics regarding the circumvallate placenta.**

| Author           | Year | Location | Type     | Comp | Placenta      | Total | Control | N   |
|------------------|------|----------|----------|------|---------------|-------|---------|-----|
| Swanson K [2]    | 2021 | USA      | Original | --   | Cir, Suc, Mul | 311   | --      | 3   |
| Celik OY [4]     | 2021 | TUR      | Original | Yes  | Cir           | 154   | 77      | 77  |
| Volodarsky A [6] | 2021 | CAN      | Original | No   | Cir, Suc, Mul | 677   |         | 8   |
| Hasegawa J [7]   | 2021 | JPN      | Case     | --   | Cir           | --    | --      | 1   |
| Volodarsky A [9] | 2020 | CAN      | Original | --   | Cir, Suc, Mul | 1057  | --      | 11  |
| Sacha CR [8]     | 2020 | USA      | Original | --   | Cir, Suc, Mul | 1140  | --      | 62  |
| Sharma N [14]    | 2017 | IND      | Case     | --   | Cir           | --    | --      | 1   |
| Suzuki S [19]    | 2015 | JPN      | Original | No   | Cir, Suc, Mul | 16965 | 16748   | 217 |
| Taniguchi H [21] | 2014 | JPN      | Original | Yes  | Cir           | 9149  | 9057    | 92  |
| Suzuki S [25]    | 2010 | JPN      | Original | Yes  | Suc, Cir      | 11311 | 11096   | 215 |
| Suzuki S [26]    | 2008 | JPN      | Original | Yes  | Cir           | 722   | 711     | 11  |
| Suzuki S [27]    | 2008 | JPN      | Original | Yes  | Cir           | 7930  | 7666    | 139 |
| Ventolini G [30] | 2004 | USA      | Original | --   | Cir           | 88    | --      | 3   |
| Harris RD [35]   | 1997 | USA      | Original | --   | CIr           | 62    | 49      | 1*  |
| McCarthy J [37]  | 1995 | USA      | Original | No   | CIr           | --    | --      | 12  |
| Sistrom CL [38]  | 1993 | USA      | Original | No   | Cir           | 1784  | 1781    | 3   |
| Bey M [40]       | 1991 | USA      | Case     | --   | Cir           | --    | --      | 1   |
| Rolschau J [45]  | 1978 | DEN      | Original | Yes  | Cir           | 447   | 426     | 19  |

\*12 cases were partial circumvallate placenta. Abbreviations: type, type of study; comp, comparator study; Placenta, included type of abnormal placenta; --, not applicable; Mul, multilobed placenta, Suc, succenturiate placenta; Cir, circumvallate placenta; N, number of women with circumvallate placenta; Comp, comparator study; USA, United States of America; Tur, Turkey; CAN, Canada; JPN, Japan; DEN, Denmark

**Table S4. Study characteristics regarding the succenturiate lobe placenta.**

| Author               | Year | Location | Type     | Placenta      | Total | N   |
|----------------------|------|----------|----------|---------------|-------|-----|
| Swanson K [2]        | 2021 | USA      | Original | Suc, Mul, Cir | 313   | 6   |
| Detweiler M [5]      | 2021 | USA      | Case     | Suc           | --    | 1   |
| Volodarsky A [6]     | 2021 | CAN      | Original | Suc, Mul, Cir | 677   | 6   |
| Sacha CR [8]         | 2020 | USA      | Original | Mul, Suc      | 1040  | 70  |
| Volodarsky A [9]     | 2020 | CAN      | Original | Suc, Mul, Cir | 1057  | 13  |
| Hamadeh S [13]       | 2018 | KSA      | Case     | Suc           | --    | 1   |
| Stelzl PW [15]       | 2017 | USA      | Case     | Suc           | --    | 1   |
| Ma JS [16]           | 2016 | CHN      | Original | Suc           | 28256 | 294 |
| Suzuki S [19]        | 2015 | JPN      | Original | Cir, Suc, Mul | 16965 | 114 |
| Patra S [20]         | 2015 | IND      | Case     | Suc           | --    | 1   |
| Cavaliere AF [22]    | 2014 | ITA      | Case     | Suc           | --    | 1   |
| Morales J [24]       | 2012 | SPN      | Case     | Suc           | --    | 1   |
| Suzuki S [25]        | 2010 | JPN      | Original | Suc, Cir      | 11311 | 83  |
| Suzuki S [28]        | 2008 | JPN      | Original | Suc           | 7703  | 47  |
| Seleye-Fubara D [29] | 2005 | NGA      | Case     | Suc           | --    | 1   |
| Shukunami K [32]     | 2001 | JPN      | Case     | Suc           | --    | 2   |
| Chihara H [34]       | 2000 | JPN      | Case     | Suc           | --    | 1   |
| Hata K [43]          | 1988 | JPN      | Series   | Suc           | --    | 5   |
| Jeanty P [44]        | 1983 | BEL      | Series   | Suc           | --    | 4   |
| Nelson LH [46]       | 1977 | USA      | Case     | Suc           | --    | 1   |

Abbreviations: type, type of study; comp, complications; --, not applicable; Placenta, included type of abnormal placenta; Mul, multilobed placenta; Suc, succenturiate placenta; Cir, circumvallate placenta; N, number of women with succenturiate lobe placenta; USA, United States of America; CAN, Canada; KSA, Kingdom of Saudi Arabia; CHN, China; JPN, Japan; IND, India; ITA, Italy; NGA, Nigeria; BEL, Belgium.

**Table S5. Study characteristics regarding the multilobed placenta.**

| Author           | Year | Location | Type     | Placenta      | Total | N  |
|------------------|------|----------|----------|---------------|-------|----|
| Smith M [1]      | 2022 | NZL      | Case     | Mul (Furcate) | --    | 1  |
| Swanson K [2]    | 2021 | USA      | Original | Suc, Mul, Cir | 311   | 2  |
| Volodarsky A [6] | 2021 | CAN      | Original | Suc, Mul, Cir | 695   | 11 |
| Volodarsky A [9] | 2020 | CAN      | Original | Suc, Mul, Cir | 1057  | 17 |
| Abgral M [10]    | 2020 | FRN      | Case     | Mul           | --    | 2  |
| Walter A [11]    | 2020 | GER      | Series   | Mul           | --    | 5* |
| Biswas PR [17]   | 2016 | BGD      | Case     | Mul           | --    | 1  |
| Yang PY [18]     | 2016 | JPN      | Case     | Mul           | --    | 1  |
| Suzuki S [19]    | 2015 | JPN      | Original | Cir, Suc, Mul | 16965 | 24 |
| Brucks UA [31]   | 2002 | USA      | Case     | Mul           | --    | 1  |
| Walkup DWM [33]  | 2001 | USA      | Case     | Mul           | --    | 1  |

Abbreviations: type, type of study; comp, complications; Placenta, included type of abnormal placenta; Mul, multilobed placenta; Suc, succenturiate placenta; Cir, circumvallate placenta; N, number of women with multilobed placenta; --; not applicable; NZL, New Zealand; USA, United States of America; CAN, Canada; FRN, France; GER, Germany; BGD, Bangladesh; JPN, Japan. \* All cases were twins.

**Table S6. Previous studies regarding the placenta membranacea.**

| Author              | Year | Location | Type     | Total | N |
|---------------------|------|----------|----------|-------|---|
| Tang L [12]         | 2019 | CHN      | Original | 79862 | 3 |
| Ravangard SF [23]   | 2013 | USA      | Case     | --    | 1 |
| Dinh TV [39]        | 1992 | USA      | Case     | --    | 1 |
| Greenberg JA [41]   | 1991 | USA      | Case     | --    | 1 |
| Wilkins BS [42]     | 1991 | GER      | Series   | --    | 7 |
| Mathews J [48]      | 1974 | AUS      | Case     | --    | 1 |
| Wladimiroff JW [47] | 1973 | NLD      | Case     | --    | 1 |

Abbreviations: type, type of study; comp, complications; Placenta, included type of abnormal placenta; N, number of women with placenta membranacea; original, original articles, series, case series; case, case reports; --; not applicable; CHN, China; USA, United States of America; GER, Germany; AUS, Australia; NLD, Netherland.



## References

- Smith, M.; McCullum, B. Furcate umbilical cord insertion with a bilobed placenta identified on prenatal ultrasonography. *Australasian Journal of Ultrasound in Medicine* **2022**, *25*, 98-102, doi:<https://doi.org/10.1002/ajum.12293>.
- Swanson, K.; Huang, D.; Kaing, A.; Blat, C.; Rosenstein, M.G.; Mok-Lin, E.; Gras, J.; Sperling, J.D. Is Preimplantation Genetic Testing Associated with Increased Risk of Abnormal Placentation After Frozen Embryo Transfer? *American journal of perinatology* **2021**, *38*, 105-110, doi:10.1055/s-0040-1714681.
- Kutuk, M.S.; Takmaz, T.; Bayram, A.; Ozturk, S. Prenatal Sonographic Detection of Monochorionic Twins with Bipartite Placenta. *Fetal and pediatric pathology* **2021**, *40*, 685-690, doi:10.1080/15513815.2020.1725938.
- Celik, O.Y.; Obut, M.; Keles, A.; Calik, M.G.; Dagdeviren, G.; Yucel, A.; Sahin, D. Outcomes of pregnancies diagnosed with circumvallate placenta, and use of uterine artery pulsatility index and maternal serum alpha-fetoprotein for prediction of adverse outcomes. *European journal of obstetrics, gynecology, and reproductive biology* **2021**, *262*, 57-61, doi:10.1016/j.ejogrb.2021.05.008.
- Detweiler, M.; Downs, E. Sonographic Detection of Placenta Percreta With Associated Placenta Previa and Succenturiate Lobe. *Journal of Diagnostic Medical Sonography* **2021**, *37*, 194-199, doi:10.1177/8756479320978779.
- Volodarsky-Perel, A.; Ton Nu, T.N.; Buckett, W.; Machado-Gedeon, A.; Cui, Y.; Shaul, J.; Dahan, M.H. Effect of embryo stage at transfer on placental histopathology features in singleton live births resulting from fresh embryo transfers. *Fertility and sterility* **2021**, *115*, 673-682, doi:10.1016/j.fertnstert.2020.06.017.
- Hasegawa, J.; Furuya, N.; Doi, M.; Sasaki, T.; Takagi, M.; Suzuki, N. Sono-embryological assessments of a true knot that developed into a hypercoiled cord and circumvallate placenta. *The journal of maternal-fetal & neonatal medicine : the official journal of the European Association of Perinatal Medicine, the Federation of Asia and Oceania Perinatal Societies, the International Society of Perinatal Obstet* **2021**, *34*, 4162-4166, doi:10.1080/14767058.2019.1704247.
- Sacha, C.R.; Harris, A.L.; James, K.; Basnet, K.; Freret, T.S.; Yeh, J.; Kaimal, A.; Souter, I.; Roberts, D.J. Placental pathology in live births conceived with in vitro fertilization after fresh and frozen embryo transfer. *American journal of obstetrics and gynecology* **2020**, *222*, 360.e361-360.e316, doi:10.1016/j.ajog.2019.09.047.
- Volodarsky-Perel, A.; Nu, T.N.T.; Buckett, W.; Machado-Gedeon, A.; Cui, Y.; Shaul, J.; Dahan, M.H. Effect of newborn gender on placental histopathology and perinatal outcome in singleton live births following IVF. *Reproductive biomedicine online* **2020**, *41*, 907-916, doi:10.1016/j.rbmo.2020.08.002.
- Abgral, M.; Martinovic, J.; Bonnin, A.; Houllier, M.; Senat, M.V.; Bouchghoul, H. Two separate placental masses on ultrasound do not always indicate a dichorionic pregnancy. *Journal of gynecology obstetrics and human reproduction* **2020**, *49*, 101694, doi:10.1016/j.jogoh.2020.101694.
- Walter, A.; Strizek, B.; Berg, C.; Geipel, A.; Gembruch, U.; Engels, A.C. Outcome of monochorionic twins with prenatally diagnosed bipartite placenta. *Archives of gynecology and obstetrics* **2020**, *302*, 1549-1552, doi:10.1007/s00404-019-05364-w.
- Tang, L.; Xu, L.; Hu, Y.; Zhang, L.; Wei, Q.; Wu, L. Placenta membranacea: an anomaly of the placenta: Three case reports. *Medicine* **2019**, *98*, e16166, doi:10.1097/md.00000000000016166.
- Hamadeh, S.; Addas, B.; Hamadeh, N.; Rahman, J. Succenturiate placenta - abruption in a young primigravida: an unusual presentation. *CEOG* **2018**, *45*, 789-790, doi:10.12891/ceog4431.2018.
- Sharma, N.; Das, R.; Salam, S.; Jethani, R.; Singh, A.S. Coexistent Circumvallate Placenta and Battledore Insertion of Umbilical Cord Resulting in Grave Obstetric Outcome: A Case Report. *Journal of reproduction & infertility* **2017**, *18*, 390-392.
- Stelzl, P.W.; Yadav, G.; Perley, L.; Silasi, M. Early sonographic detection of a succenturiate placenta after IVF in a 42-year-old woman with multiple comorbidities. *BMJ case reports* **2017**, *2017*, doi:10.1136/bcr-2017-222189.
- Ma, J.S.; Mei, X.; Niu, Y.X.; Li, Q.G.; Jiang, X.F. Risk Factors and Adverse Pregnancy Outcomes of Succenturiate Placenta: A Case-Control Study. *The Journal of reproductive medicine* **2016**, *61*, 139-144.
- Biswas, P.R.; Paul, G.K.; Chowdhury, M.; Selim, M. A Rare Shape of Placenta; Placenta Bipartite, Bilobata, Dimidiate, Duplex: A Rare Case Report. *Bangladesh Journal of Obstetrics & Gynaecology* **2017**, *31*, 101-103, doi:10.3329/bjog.v31i2.34220.
- Yang P-Y, K.K., Ishibashi M, Mori N, Hata T. . HDliveFlow with HDlive Silhouette Mode in Antenatal Diagnosis of Bilobed Placenta. *Donald School J Ultrasound Obstet Gynecol* **2016**, *10*, 415-417.
- Suzuki, S.; Kato, M. Clinical Significance of Pregnancies Complicated by Velamentous Umbilical Cord Insertion Associated With Other Umbilical Cord/Placental Abnormalities. *Journal of clinical medicine research* **2015**, *7*, 853-856, doi:10.14740/jocmr2310w.
- Patra, S.; Mistry, P.K.; Dutta, M.; Das, I. Placenta Previa with Succenturiate Placenta®Delivered with a Living Healthy Baby. *Bangladesh Journal of Obstetrics & Gynaecology* **2016**, *30*, 116-118, doi:10.3329/bjog.v30i2.30908.
- Taniguchi, H.; Aoki, S.; Sakamaki, K.; Kurasawa, K.; Okuda, M.; Takahashi, T.; Hirahara, F. Circumvallate placenta: associated clinical manifestations and complications-a retrospective study. *Obstetrics and gynecology international* **2014**, *2014*, 986230, doi:10.1155/2014/986230.
- Cavaliere, A.F.; Rosati, P.; Ciliberti, P.; Buongiorno, S.; Guariglia, L.; Scambia, G.; Tintoni, M. Succenturiate lobe of placenta with vessel anomaly: a case report of prenatal diagnosis and literature review. *Clinical imaging* **2014**, *38*, 747-750, doi:10.1016/j.clinimag.2014.01.018.
- Ravangard, S.F.; Henderson, K.; Fuller, K. Placenta membranacea. *Archives of gynecology and obstetrics* **2013**, *288*, 709-712, doi:10.1007/s00404-013-2778-z.
- Morales-Roselló, J.; Peralta Llorens, N. Doppler impedance changes at the fetal brain vessels in a pregnancy affected with a multiple combination of uteroplacental anomalies. *Case reports in medicine* **2012**, *2012*, 293156, doi:10.1155/2012/293156.
- Suzuki, S.; Igarashi, M.; Inde, Y.; Miyake, H. Abnormally shaped placentae in twin pregnancy. *Archives of gynecology and obstetrics* **2010**, *281*, 65-69, doi:10.1007/s00404-009-1064-6.
- Suzuki, S. Antenatal screening for circumvallate placenta. *Journal of medical ultrasonics (2001)* **2008**, *35*, 71-73, doi:10.1007/s10396-007-0168-5.
- Suzuki, S. Clinical significance of pregnancies with circumvallate placenta. *The journal of obstetrics and gynaecology research* **2008**,

- 34, 51-54, doi:10.1111/j.1447-0756.2007.00682.x.
28. Suzuki, S.; Igarashi, M. Clinical significance of pregnancies with succenturiate lobes of placenta. *Archives of gynecology and obstetrics* **2008**, *277*, 299-301, doi:10.1007/s00404-007-0482-6.
29. Seleye-Fubara, D.; Akani, C.I. Succenturiate placenta: a rare variant in Rivers State Nigeria (a report of one case). *Nigerian journal of medicine : journal of the National Association of Resident Doctors of Nigeria* **2005**, *14*, 325-326.
30. Ventolini, G.; Samlowski, R.; Hood, D.L. Placental findings in low-risk, singleton, term pregnancies after uncomplicated deliveries. *American journal of perinatology* **2004**, *21*, 325-328, doi:10.1055/s-2004-831882.
31. Brucks, U.A.; Duval, J.R. Perinatal Evaluation of the Bilobed or Bipartite Placenta. *Journal of Diagnostic Medical Sonography* **2002**, *18*, 161-166, doi:10.1177/87579302018003009.
32. Shukunami, K.; Tsunazawa, W.; Hosokawa, K.; Tajima, K.; Kotsuji, F. Placenta previa of a succenturiate lobe: a report of two cases. *European journal of obstetrics, gynecology, and reproductive biology* **2001**, *99*, 276-277, doi:10.1016/s0301-2115(01)00385-2.
33. Walkup, D.W.M. A Rare Case of Duplicated Placenta and Bifurcated Umbilical Cord in a Singleton Pregnancy. *Journal of Diagnostic Medical Sonography* **2001**, *17*, 280-285, doi:10.1177/875647930101700507.
34. Chihara, H.; Otsubo, Y.; Ohta, Y.; Araki, T. Prenatal diagnosis of succenturiate lobe by ultrasonography and color Doppler imaging. *Archives of gynecology and obstetrics* **2000**, *263*, 137-138, doi:10.1007/s004040050013.
35. Harris, R.D.; Wells, W.A.; Black, W.C.; Chertoff, J.D.; Poplack, S.P.; Sargent, S.K.; Crow, H.C. Accuracy of prenatal sonography for detecting circumvallate placenta. *AJR. American journal of roentgenology* **1997**, *168*, 1603-1608, doi:10.2214/ajr.168.6.9168736.
36. Steemers, N.Y.; De Rop, C.; Van Assche, A. Zonary placenta. *International journal of gynaecology and obstetrics: the official organ of the International Federation of Gynaecology and Obstetrics* **1995**, *51*, 251-253, doi:10.1016/0020-7292(95)80020-4.
37. McCarthy, J.; Thurmond, A.S.; Jones, M.K.; Siström, C.; Scanlan, R.M.; Jacobson, S.L.; Lowensohn, R. Circumvallate placenta: sonographic diagnosis. *Journal of ultrasound in medicine : official journal of the American Institute of Ultrasound in Medicine* **1995**, *14*, 21-26, doi:10.7863/jum.1995.14.1.21.
38. Siström, C.L.; Ferguson, J.E. Abnormal membranes in obstetrical ultrasound: incidence and significance of amniotic sheets and circumvallate placenta. *Ultrasound in obstetrics & gynecology : the official journal of the International Society of Ultrasound in Obstetrics and Gynecology* **1993**, *3*, 249-255, doi:10.1046/j.1469-0705.1993.03040249.x.
39. Dinh, T.V.; Bedi, D.G.; Salinas, J. Placenta membranacea, previa and accreta. A case report. *The Journal of reproductive medicine* **1992**, *37*, 97-99.
40. Bey, M.; Dott, A.; Miller, J.M., Jr. The sonographic diagnosis of circumvallate placenta. *Obstetrics and gynecology* **1991**, *78*, 515-517.
41. Greenberg, J.A.; Sorem, K.A.; Shifren, J.L.; Riley, L.E. Placenta membranacea with placenta increta: a case report and literature review. *Obstetrics and gynecology* **1991**, *78*, 512-514.
42. Wilkins, B.S.; Batcup, G.; Vinall, P.S. Partial placenta membranacea. *British journal of obstetrics and gynaecology* **1991**, *98*, 675-679, doi:10.1111/j.1471-0528.1991.tb13454.x.
43. Hata, K.; Hata, T.; Aoki, S.; Takamori, H.; Takamiya, O.; Kitao, M. Succenturiate placenta diagnosed by ultrasound. *Gynecologic and obstetric investigation* **1988**, *25*, 273-276, doi:10.1159/000293798.
44. Jeanty, P.; Kirkpatrick, C.; Verhoogen, C.; Struyven, J. The Succenturiate Placenta. *Journal of Ultrasound in Medicine* **1983**, *2*, 9-12, doi:<https://doi.org/10.7863/jum.1983.2.1.9>.
45. Rolschau, J. CIRCUMVALLATE PLACENTA AND INTRAUTERINE GROWTH RETARDATION. *Acta obstetrica et gynecologica Scandinavica* **1978**, *57*, 11-14, doi:10.1111/aogs.1978.57.s72.11.
46. Nelson, L.H.; Fishburne, J.I.; Stearns, B.R. Ultrasonographic description of succenturiate placenta. *Obstetrics and gynecology* **1977**, *49*, 79-80.
47. Wladimiroff, J.W.; Wallenburg, H.C.; vanden Putten, P.; Drogendijk, A.C. Ultrasonic diagnosis of placenta membranacea. *Archiv fur Gynakologie* **1976**, *221*, 167-174, doi:10.1007/bf00667146.
48. Mathews, J. Placenta Membranacea. *Australian and New Zealand Journal of Obstetrics and Gynaecology* **1974**, *14*, 45-47, doi:<https://doi.org/10.1111/j.1479-828X.1974.tb00823.x>.
49. Sterne, J.A.; Hernan, M.A.; Reeves, B.C.; Savovic, J.; Berkman, N.D.; Viswanathan, M.; Henry, D.; Altman, D.G.; Ansari, M.T.; Boutron, I.; et al. ROBINS-I: a tool for assessing risk of bias in non-randomised studies of interventions. *BMJ* **2016**, *355*, i4919, doi:10.1136/bmj.i4919.
50. Danna, S.M.; Graham, E.; Burns, R.J.; Deschenes, S.S.; Schmitz, N. Association between Depressive Symptoms and Cognitive Function in Persons with Diabetes Mellitus: A Systematic Review. *PLoS One* **2016**, *11*, e0160809, doi:10.1371/journal.pone.0160809.
51. ROBINS-I detailed guidance (2016). <https://www.riskofbias.info/welcome/home/current-version-of-robins-i/robins-i-detailed-guidance-2016>. (accessed 02/20/2023).
